# Supplementary material for: Polymeric membrane potentiometric antibiotic sensors using computer-aided screening of supramolecular macrocyclic carriers
Source: Royal Society of Chemistry journal article supplement (doi:10.1039/d3an02154h), 2024-01-01
Supplement: d3an02154h1.pdf [file d3an02154h1.pdf]

***Supporting Information for***  
**Polymeric membrane potentiometric antibiotic sensors using**  
**computer-aided screening of supramolecular macrocyclic carriers**

Aohua Liu,<sup>a, b</sup> Zhe Liu,<sup>b</sup> Rongning Liang<sup>b, \*</sup> and Wei Qin<sup>b, c, d, \*</sup>

<sup>a</sup> School of Pharmacy, Binzhou Medical University, Yantai, Shandong 264003, P. R. China

<sup>b</sup> CAS Key Laboratory of Coastal Environmental Processes and Ecological Remediation, Yantai Institute of Coastal Zone Research (YIC), Chinese Academy of Sciences (CAS); Shandong Key Laboratory of Coastal Environmental Processes, YICCAS, Yantai, Shandong 264003, P. R. China

<sup>c</sup> Laboratory for Marine Biology and Biotechnology, Qingdao National Laboratory for Marine Science and Technology, Qingdao, Shandong 266237, P. R. China

<sup>d</sup> Center for Ocean Mega-Science, Chinese Academy of Sciences, Qingdao, Shandong 266071, P.R. China

\* Corresponding authors. Fax: +86-535-2109000

E-mail addresses: rnlwang@yic.ac.cn; wqin@yic.ac.cn

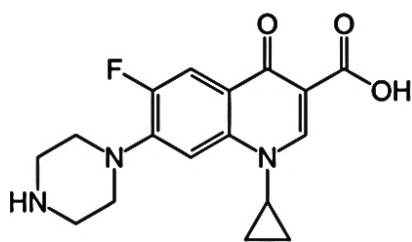

Neutral CIP

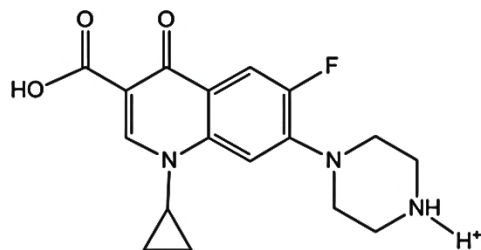

Protonated CIP

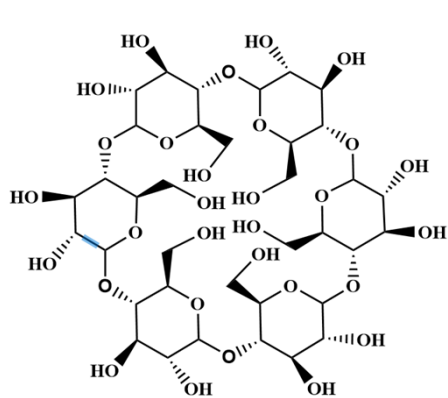

$\alpha$ -CD

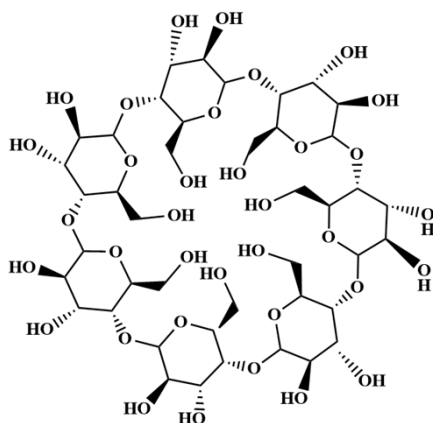

$\beta$ -CD

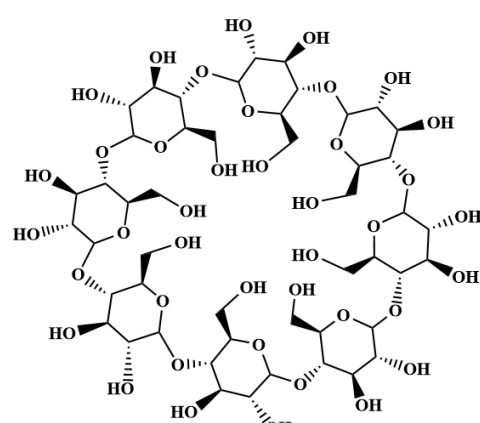

$\gamma$ -CD

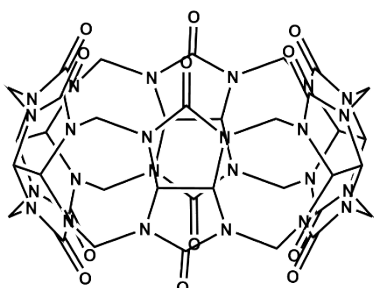

CB[6]

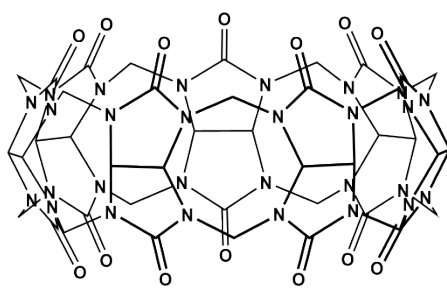

CB[7]

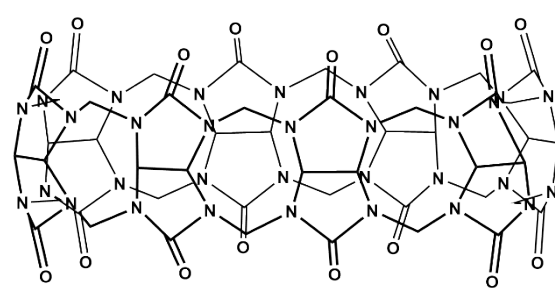

CB[8]

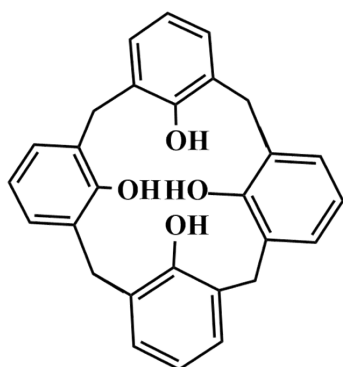

calix [4] arene

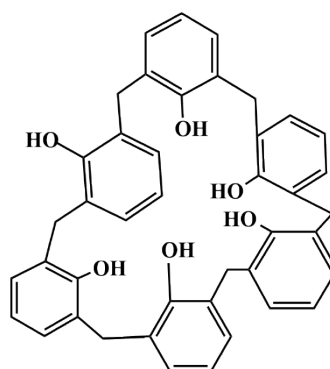

calix [6] arene

Fig. S1. Chemical structures of 8 organic carriers and CIP.

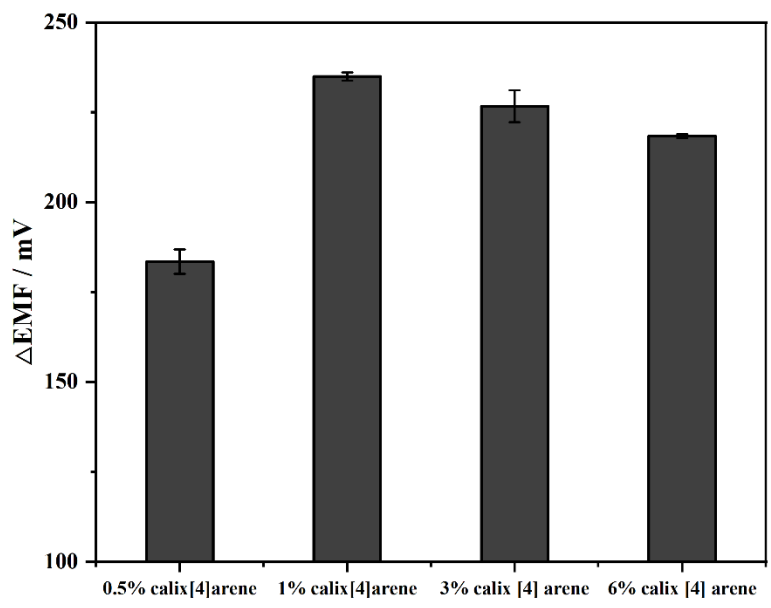

**Fig. S2.** Effect of the amount of the carrier calix [4] arene on the potential response.

**Table S1.** Docking and binding sites between CIP and supramolecular macrocyclic carriers.

| <b>Receptor</b>               | <b>center x</b> | <b>center y</b> | <b>center z</b> | <b>size x</b> | <b>size y</b> | <b>size z</b> |
|-------------------------------|-----------------|-----------------|-----------------|---------------|---------------|---------------|
| <b><math>\alpha</math>-CD</b> | -1              | 0               | 0               | 15            | 15            | 15            |
| <b><math>\beta</math>-CD</b>  | 0               | 0               | 0               | 15            | 15            | 15            |
| <b><math>\gamma</math>-CD</b> | 1               | 0               | 0               | 15            | 15            | 15            |
| <b>CB[6]</b>                  | -3              | 1               | 0               | 15            | 15            | 15            |
| <b>CB[7]</b>                  | -2              | 1               | 1               | 15            | 15            | 15            |
| <b>CB[8]</b>                  | -4              | -1              | 0               | 16            | 16            | 16.5          |
| <b>calix [4] arene</b>        | -2              | 0               | 0               | 15            | 15            | 15            |
| <b>calix [6] arene</b>        | 0               | 0               | 0               | 15            | 15            | 15            |

**Table S2.** Non-covalent interactions between 8 carriers and neutral CIP and corresponding bond lengths.

| <b>Creatinine complex</b>        | <b>Interaction</b>               | <b>Category</b>        | <b>Type</b>                | <b>Bond length(Å)</b>      |      |
|----------------------------------|----------------------------------|------------------------|----------------------------|----------------------------|------|
| <b>Calix[4]arene-neutral CIP</b> | benzene...cyclopropane           | Hydrophobic            | Pi-Alkyl                   | 3.75                       |      |
|                                  | benzene...cyclopropane           | Hydrophobic            | Pi-Alkyl                   | 4.03                       |      |
|                                  | benzene...cyclopropane           | Hydrophobic            | Pi-Alkyl                   | 4.36                       |      |
|                                  | benzene...cyclopropane           | Hydrophobic            | Pi-Alkyl                   | 4.10                       |      |
|                                  | calix[4]arene...cyclopropane     | Hydrophobic            | Alkyl                      | 3.05                       |      |
|                                  | <b>Calix[6]arene-neutral CIP</b> | benzene...benzene      | Hydrophobic                | Pi-Pi T-shaped             | 5.32 |
|                                  |                                  | benzene...cyclopropane | Hydrophobic                | Pi-Alkyl                   | 5.44 |
| <b>β-CD-neutral CIP</b>          | C...O-H26                        | Hydrogen Bond          | Conventional Hydrogen Bond | 3.58                       |      |
|                                  | H128...O-C                       | Hydrogen Bond          | Conventional Hydrogen Bond | 1.90                       |      |
|                                  | H153...F                         | Hydrogen bond          | Hydrogen /Halogen Bond     | 2.85                       |      |
|                                  | H108...O-C                       | Hydrogen Bond          | Carbon Hydrogen Bond       | 2.52                       |      |
|                                  | H152...F-C                       | Hydrogen Bond          | Carbon Hydrogen Bond       | 2.74                       |      |
|                                  | H156...O=C                       | Hydrogen Bond          | Carbon Hydrogen Bond       | 2.80                       |      |
|                                  | H161...O=C                       | Hydrogen Bond          | Carbon Hydrogen Bond       | 2.71                       |      |
|                                  | H164...O=C                       | Hydrogen Bond          | Carbon Hydrogen Bond       | 2.49                       |      |
|                                  | <b>CB[7]-neutral CIP</b>         | C=O...H26              | Hydrogen Bond              | Conventional Hydrogen Bond | 3.06 |
| C=O...H26                        |                                  | Hydrogen Bond          | Conventional Hydrogen Bond | 1.97                       |      |
| C=O...C                          |                                  | Hydrogen Bond          | Carbon Hydrogen Bond       | 3.51                       |      |

|                                                |                |                                     |                               |      |
|------------------------------------------------|----------------|-------------------------------------|-------------------------------|------|
| <b><math>\gamma</math>-CD- neutral<br/>CIP</b> | C=O...benzene  | Hydrogen<br>Bond                    | Pi-Donor<br>Hydrogen Bond     | 3.29 |
|                                                | C-O...F        | Hydrogen<br>bond<br>Halogen<br>bond | Hydrogen/Hal<br>ogen Bond     | 3.21 |
|                                                | H158...O=C     | Hydrogen<br>Bond                    | Carbon<br>Hydrogen Bond       | 2.46 |
|                                                | C-O...benzene  | Hydrogen<br>Bond                    | Pi-Donor<br>Hydrogen Bond     | 3.42 |
| <b><math>\alpha</math>-CD- neutral<br/>CIP</b> | C-O...benzene  | Hydrogen<br>Bond                    | Pi-Donor<br>Hydrogen Bond     | 3.94 |
|                                                | C-O...H26      | Hydrogen<br>Bond                    | Conventional<br>Hydrogen Bond | 2.70 |
|                                                | H149...O=C     | Hydrogen<br>Bond                    | Conventional<br>Hydrogen Bond | 2.83 |
|                                                | H122...O-C     | Hydrogen<br>Bond                    | Carbon<br>Hydrogen Bond       | 2.86 |
| <b>CB[8]-neutral<br/>CIP</b>                   | C=O...C        | Hydrogen<br>Bond                    | Carbon<br>Hydrogen Bond       | 3.71 |
|                                                | C=O...F        | Halogen<br>Bond                     | Halogen Bond                  | 3.20 |
| <b>CB[6]-neutral<br/>CIP</b>                   | C=O...H26      | Hydrogen<br>Bond                    | Conventional<br>Hydrogen Bond | 2.74 |
|                                                | C=O...O-H26    | Hydrogen<br>Bond                    | Conventional<br>Hydrogen Bond | 3.03 |
|                                                | C=O...C        | Hydrogen<br>Bond                    | Carbon<br>Hydrogen Bond       | 3.80 |
|                                                | C=O... benzene | Hydrogen<br>Bond                    | Pi-Donor<br>Hydrogen Bond     | 3.45 |

**Table S3.** Non-covalent interactions between 8 carriers and protonated CIP and

corresponding bond lengths.

| <b>Creatinine complex</b>           | <b>Interaction</b>           | <b>Category</b>               | <b>Type</b>                | <b>Bond length(Å)</b> |
|-------------------------------------|------------------------------|-------------------------------|----------------------------|-----------------------|
| <b>Calix[4]arene-protonated CIP</b> | benzene...benzene            | Hydrophobic                   | Pi-Pi Stacked              | 4.92                  |
|                                     | benzene...piperazine         | Hydrophobic                   | Pi-Pi Stacked              | 4.29                  |
|                                     | calix[4]arene...cyclopropane | Hydrophobic                   | Alkyl                      | 3.01                  |
|                                     | benzene...cyclopropane       | Hydrophobic                   | Pi-Alkyl                   | 3.72                  |
|                                     | benzene...cyclopropane       | Hydrophobic                   | Pi-Alkyl                   | 4.34                  |
|                                     | benzene...cyclopropane       | Hydrophobic                   | Pi-Alkyl                   | 3.96                  |
|                                     | benzene...cyclopropane       | Hydrophobic                   | Pi-Alkyl                   | 4.13                  |
| <b>Calix[6]arene-protonated CIP</b> | benzene...benzene            | Hydrophobic                   | Pi-Pi Stacked              | 4.33                  |
|                                     | benzene...piperazine         | Hydrophobic                   | Pi-Pi Stacked              | 5.30                  |
|                                     | benzene...piperazine         | Hydrophobic                   | Pi-Pi T-shaped             | 5.80                  |
|                                     | benzene...cyclopropane       | Hydrophobic                   | Pi-Alkyl                   | 5.29                  |
|                                     | C...H42-O                    | Hydrogen bond                 | Carbon hydrogen bond       | 3.71                  |
| <b>β-CD-protonated CIP</b>          | H129...F                     | Hydrogen bond<br>Halogen bond | Hydrogen/Halogen bond      | 2.69                  |
|                                     | H152...C=O                   | Hydrogen bond                 | Conventional hydrogen bond | 2.98                  |
|                                     | C...O-H170                   | Hydrogen bond                 | Carbon hydrogen bond       | 3.53                  |
|                                     | H152...O=C                   | Hydrogen bond                 | Carbon hydrogen bond       | 2.60                  |
|                                     | H165...F-C                   | Hydrogen bond                 | Carbon hydrogen bond       | 2.41                  |
| H167...F-C                          | Hydrogen bond                | Carbon hydrogen bond          | 2.20                       |                       |

|                                                   |               |               |                            |      |
|---------------------------------------------------|---------------|---------------|----------------------------|------|
| <b>CB[7]-<br/>protonated CIP</b>                  | C=O...H27     | Hydrogen Bond | Conventional hydrogen bond | 2.83 |
|                                                   | C=O...H27     | Hydrogen bond | Conventional hydrogen bond | 1.94 |
|                                                   | C=O...O=C     | Hydrogen bond | Conventional hydrogen bond | 2.86 |
|                                                   | C=O...O=C     | Hydrogen bond | Conventional hydrogen bond | 3.05 |
|                                                   | C=O...benzene | Hydrogen bond | Pi-Donor hydrogen bond     | 3.92 |
| <b><math>\gamma</math>-CD-<br/>protonated CIP</b> | H147...O=C    | Hydrogen bond | Conventional hydrogen bond | 2.83 |
|                                                   | H185O...C     | Hydrogen bond | Carbon hydrogen bond       | 3.50 |
| <b><math>\alpha</math>-CD-<br/>protonated CIP</b> | H142O...H16   | Hydrogen bond | Conventional hydrogen bond | 1.99 |
|                                                   | H111-O...C    | Hydrogen bond | Carbon hydrogen bond       | 3.44 |
|                                                   | H95...F-C     | Hydrogen bond | Carbon hydrogen bond       | 2.43 |
| <b>CB[8]-<br/>protonated CIP</b>                  | C=O...C       | Hydrogen bond | Carbon hydrogen bond       | 3.4  |
|                                                   | C=O...H27     | Hydrogen bond | Conventional hydrogen bond | 2.6  |
| <b>CB[6]-<br/>protonated CIP</b>                  | C=O...C       | Hydrogen bond | Carbon hydrogen bond       | 3.53 |
|                                                   | H27...O=C     | Hydrogen bond | Conventional hydrogen bond | 3.03 |

---
